# Supplementary material for: Safe Reopening Following Generalized Lockdowns: A Strategy Based on Evidence from 24 Worldwide Countries
Source: Research Square preprint supplement (doi:10.21203/rs.3.rs-371069/v1), 2021-04-13
Supplement: Supplementary file 1 [file 5b8356cc8c0151c1cf338895.docx]

**Safe Reopening Following Generalized Lockdowns: A Strategy Based on Evidence from 24 Worldwide Countries**

**SUPPLEMENTARY MATERIAL**

**APPENDIX:** Data collection process

**Electronic databases review**

For the study, we collected COVID -19 epidemiological data including daily number of cases, recoveries, deaths, and tests from 24 study countries from the Worldometer electronic database. The countries were selected based on comprehensive data availability, and spatial geographical and economic gradients. The data collection period differed across the countries due to variations in the emergence and trajectories of the virus. Generally, the data gathered ranged between 1 February 2020 and 3 June 2020. We have also collected different country-specific economic, health, and development indicators such as per capita Gross Domestic Product (GDP), Human Development Index (HDI), Social Progress Index (SPI), and Worldwide Governance Indicators (WGI) from corresponding credible sources mentioned below. Furthermore, we obtained country-wise community mobility data over time during lock from the Google COVID-19 community mobility report. The details of data sources are available in the Appendix below.

**Lockdown and reopening data extraction sources**

1. New Zealand: went to alert level 4 on the March 25th and came back to alert level 2 on May 13 (IMF: Policy Response to COVID)

2. Germany: went on Stay-at-home orders on March 21th (https://ourworldindata.org/). On May 6th, the government announced easing for shops, restaurants and sports facilities, where the exact timeline is decided by the state. (IMF: Policy Response to COVID).

3. Austria: Lockdown and reopening dates are taken from the https://ourworldindata.org/

4. Japan: Government annpunced lockdown on the April 7th and May 25th stat of emergency was listed for all prefactures (IMF: Policy Response to COVID).

5. Australia: Lockdown and re-opening days are taken from <https://ourworldindata.org/>.

6. Turkey: Lockdown data is taken from <https://ourworldindata.org/> and reopening date from the IMF (IMF: Policy Response to COVID).

7. Spain: Lockdown and re-opening days are taken from <https://ourworldindata.org/>.

8. Singapore: Lockdown data is taken from <https://ourworldindata.org/> and reopening date from the IMF (IMF: Policy Response to COVID).

9. Denmark: Lockdown data is taken from <https://ourworldindata.org/> and reopening date from the IMF (IMF: Policy Response to COVID).

10. Iran: On March 25, Iran announced a partial lockdown and ordered a step-by-step reopening of businesses on April 8 (IMF: Policy Response to COVID).

11. Saudi Arabia: Lockdown and re-opening days are taken from <https://ourworldindata.org/>.

12. Italy: Lockdown data is taken from <https://ourworldindata.org/> and reopening date from the IMF. (IMF: Policy Response to COVID).

13. Romania: Lockdown and re-opening days are taken from <https://ourworldindata.org/>.

14. Hungary: Lockdown and reopening data is taken from <https://ourworldindata.org/>

15. Pakistan: Lockdown date is taken from <https://ourworldindata.org/>, reopening date is taken from the following newspaper: <https://www.usnews.com/news/world/articles/2020-05-07/pakistan-to-lift-lockdown-from-saturday-despite-rising-covid-19-curve>

16. Colombia: Lockdown and reopening date from the IMF. (IMF: Policy Response to COVID).

17. Poland: Lockdown data is taken from <https://ourworldindata.org/> and reopening date from the IMF. (IMF: Policy Response to COVID).

18. Ghana: Lockdown data is taken from <https://ourworldindata.org/> and reopening date from the IMF. (IMF: Policy Response to COVID).

19. Croatia: Lockdown and re-opening days are taken from <https://ourworldindata.org/>.

20. Mali: Lockdown data is taken from <https://ourworldindata.org/> and reopening date from the IMF (IMF: Policy Response to COVID).

21. Malaysia: Lockdown and re-opening days are taken from <https://ourworldindata.org/>.

22. Thailand: Lockdown date is taken from <https://ourworldindata.org/>, reopening date is taken from the following newspaper: <https://www.tatnews.org/2020/06/thailand-announces-fourth-phase-of-relaxing-business-and-activity-restrictions-from-15-june/>

23. Vietnam: Lockdown data is taken from <https://ourworldindata.org/> and reopening date from the IMF. (IMF: Policy Response to COVID).

24. Ukraine: Lockdown data is taken from <https://ourworldindata.org/> and reopening date from the IMF. (IMF: Policy Response to COVID).

**Social Progress Index:**

https://www.socialprogress.org/index/global/results

**GDP Per capita:**

https:// data.worldbank.org

**Governance Indicators:**

https://info.worldbank.org/governance/wgi/

**Google Mobility data:**

www.google. com. Average over all the index (except for residential) over the lockdown period.

**Epidemiologic data:**

https://www.worldometers.info/coronavirus/

**Human Development Index:**

http://hdr.undp.org/en/content/human-development-index-hdi

**Supplementary Table 1.** Transmission dynamics and clinical parameters used in the SIRM analysis

| **Parameter** | **Germany** | **Iran** |
| --- | --- | --- |
| *S0* = *E0* | 24,000 | 12,500 |
| Reproduction Number, *R0* | 2.8 | 2.6 |
| Initial Infected at *t* = 0 | 20.0 | 20.0 |
| Initial Recovered at *t* = 0 | 1.0 | 1.0 |
| Initial Mortality at *t* = 0 | 1.0 | 1.0 |
| Rate of recovery, *γ* (or the inversed of the duration of the unwell/sick time) | 0.1 (10 days) | 0.1 (10 days) |
| Mortality rate, *μ* | 0.004 | 0.004 |
| Calibration period to fit the Infection curve | February 15-June 3 | February 15-May 4 |
| Infection curve fitting/calibration efficiency (*Nash Sutcliffe Efficiency*) | 0.79 | 0.75 |
| Assumed % of additional people become exposed (in relation to the remaining number of *S* at the day of reopening) | 50% | 50% |

**Supplementary Table 2.** Lockdown, reopening, demographic, and economic characteristics of the 24 countries included in the study

| **Country** | **Lockdown and reopening characteristics** | | | | **Demographic and economic characteristics** | | | | |
| --- | --- | --- | --- | --- | --- | --- | --- | --- | --- |
| **Date of lockdown** | **Date for reopening** | **Date for *I-R* Crossover** | **Waiting Period, days** | **GDP/capita, in '000 USD** | **Mobility**  **Reduction, %** | **HDI,**  **2018** | **SPI,**  **2019** | **WGI,**  **2018** |
| ***Successful high-income countries*** |  |  |  |  |  |  |  |  |  |
| Australia | 4/2/2020 | 5/14/2020 | 4/5/2020 | 39 | 49.38 | -33.31 | 0.94 | 88.02 | 1.58 |
| Germany | 3/21/2020 | 5/6/2020 | 4/14/2020 | 22 | 52.56 | -45.13 | 0.94 | 88.84 | 1.50 |
| New Zealand | 3/25/2020 | 5/13/2020 | 4/10/2020 | 33 | 40.75 | -63.30 | 0.92 | 88.93 | 1.81 |
| Denmark | 3/3/2020 | 5/10/2020 | 4/13/2020 | 27 | 54.36 | -33.45 | 0.93 | 90.09 | 1.68 |
| Austria | 3/16/2020 | 4/30/2020 | 4/4/2020 | 26 | 53.88 | -68.04 | 0.91 | 86.40 | 1.46 |
| Spain | 3/14/2020 | 5/26/2020 | 4/25/2020 | 31 | 39.04 | -75.82 | 0.89 | 87.47 | 0.81 |
| Italy | 3/9/2020 | 5/4/2020 | 4/29/2020 | 5 | 40.92 | -70.21 | 0.88 | 85.69 | 0.49 |
| Japan | 4/7/2020 | 5/24/2020 | 4/30/2020 | 24 | 42.07 | -23.06 | 0.92 | 88.34 | 1.34 |
| Singapore | 4/8/2020 | 6/2/2020 | 5/13/2020 | 20 | 94.11 | -62.15 | 0.94 | 83.23 | 1.64 |
| *Overall, mean (SD)* | *-* | *-* | *-* | *25.2 (9.6)* | *51.89 (16.90)* | *-52.72 (19.24)* | *0.92 (0.02)* | *87.45 (2.07)* | *1.37 (0.44)* |
| ***Overall, Median*** |  |  |  | ***26*** |  |  |  |  |  |
| ***Successful middle/low income countries*** |  |  |  |  |  |  |  |  |  |
| Turkey | 3/21/2020 | 5/4/2020 | 4/25/2020 | 9 | 28.00 | -47.91 | 0.81 | 67.49 | -0.48 |
| Croatia | 3/23/2020 | 5/11/2020 | 4/18/2020 | 23 | 14.95 | -34.02 | 0.84 | 79.21 | 0.46 |
| Mali | 3/25/2020 | 7/24/2020 | 7/9/2020 | 15 | 0.93 | -12.09 | 0.43 | 45.98 | -0.96 |
| Malaysia | 3/18/2020 | 6/10/2020 | 6/8/2020 | 2 | 11.14 | -39.05 | 0.80 | 74.17 | 0.43 |
| Thailand | 3/21/2020 | 6/15/2020 | 4/10/2020 | 66 | 7.79 | -30.05 | 0.77 | 67.47 | -0.20 |
| Vietnam | 4/1/2020 | 4/23/2020 | 4/5/2020 | 18 | 2.74 | -32.87 | 0.69 | 68.85 | -0.33 |
| Hungary | 3/27/2020 | 5/18/2020 | 5/7/2020 | 11 | 28.80 | -41.68 | 0.85 | 78.77 | 0.46 |
| *Overall, mean (SD)* | *-* | *-* | *-* | *20.6 (21.1)* | *13.48 (11.24)* | *-33.95 (11.37)* | *0.74 (0.15)* | *68.85 (11.26)* | *-0.09 (0.56)* |
| ***Overall, Median*** |  |  |  | ***15*** |  |  |  |  |  |
| ***Unsuccessful countries*** |  |  |  |  |  |  |  |  |  |
| Romania | 3/25/2020 | 5/12/2020 | 5/10/2020 | 2 | 26.66 | -51.34 | 0.82 | 74.81 | 0.16 |
| Saudi Arabia | 3/15/2020 | 5/31/2020 | 5/26/2020 | 5 | 53.89 | -44.95 | 0.86 | 63.95 | -0.23 |
| Iran | 3/13/2020 | 4/11/2020 | 4/9/2020 | 2 | 20.89 | - | 0.80 | 65.15 | -1.00 |
| Pakistan | 3/23/2020 | 4/10/2020 | NA | 0 | 5.54 | -53.60 | 0.56 | 48.20 | -0.97 |
| Colombia | 3/25/2020 | 4/27/2020 | NA | 0 | 14.50 | -62.96 | 0.76 | 70.31 | -0.18 |
| Poland | 3/31/2020 | 4/20/2020 | NA | 0 | 29.92 | -33.93 | 0.87 | 81.25 | 0.65 |
| Ghana | 3/30/2020 | 4/23/2020 | NA | 0 | 4.50 | -45.00 | 0.60 | 61.75 | 0.05 |
| Ukraine | 3/16/2020 | 5/11/2020 | NA | 0 | 8.70 | -43.73 | 0.75 | 66.97 | -0.68 |
| *Overall, mean (SD)* | *-* | *-* | *-* | *1.1 (1.8)* | *20.6 (16.6)* | *-47.93 (9.14)* | *0.75 (0.12)* | *66.55 (9.76)* | *-0.28 (0.58)* |
| ***Overall, Median*** |  |  |  | ***0*** |  |  |  |  |  |

I-R, infection-recovery; GDP, gross domestic product; HDI, human development index; SPI, social progress index; WGI, world governance indicator; SD, standard deviation; NA, not applicable.

Mobility reduction during lockdown is calculated from the Google Mobility reports for each country.

I-R crossover denotes time point when the daily recovery rate exceeds the daily new case rate.

**Supplementary Table 3**. Major extracted factors and associated loadings of waiting period and the potential drivers

| **Variables** | **Factor 1** | **Factor 2** |
| --- | --- | --- |
| WGI | 0.95* | 0.06 |
| GDP | 0.97* | 0.24 |
| SPI | 0.91* | 0.41 |
| HDI | 0.86* | 0.30 |
| Mobility reduction | -0.01 | -0.16 |
| Lockdown duration | -0.01 | -0.26 |
| *Waiting period* | *0.47* | *0.06* |

* Denotes dominant loadings for each factor.

WGI, world governance indicator; GDP, gross domestic product; SPI, social progress index; HDI, human development index. WP was set to zero for the unsuccessful countries.

**Supplementary Table 4**. Country-specific scores derived from the factor analyses

| **Country** | **Factor 1** | **Factor 2** |
| --- | --- | --- |
| Australia | 1.32 | 0.67 |
| Austria | 1.09 | 0.12 |
| Denmark | 1.43 | 0.93 |
| Germany | 1.16 | -0.03 |
| Italy | 0.41 | -0.69 |
| Japan | 1.03 | 0.06 |
| New Zealand | 1.27 | 0.03 |
| Singapore | 1.16 | 0.31 |
| Spain | 0.69 | 0.40 |
| Croatia | 0.15 | -0.13 |
| Hungary | 0.11 | -0.45 |
| Malaysia | -0.10 | -0.33 |
| Mali | -1.83 | 2.67 |
| Thailand | -0.33 | 2.67 |
| Turkey | -0.77 | -0.44 |
| Vietnam | -0.85 | -0.22 |
| Colombia | -0.62 | -1.21 |
| Ghana | -0.97 | -0.62 |
| Iran | -1.04 | -0.49 |
| Pakistan | -1.92 | -0.29 |
| Poland | 0.20 | -1.72 |
| Romania | -0.20 | -0.89 |
| Saudi Arabia | -0.59 | 0.10 |
| Ukraine | -0.80 | -0.44 |

**Supplementary Table 5.** Recalibration of the LSR index by country-specific socioeconomic and governance indicators

| **Country** | **Lockdown duration, days** | **Crude LSR index at the reopening date** | **GDP per capita (in '000 USD, scaled)** | **HDI, 2019 (scaled)** | **SPI, 2020 (scaled)** | **WGI, 2018 (scaled)** | **Average scaling for GDP, HDI, SPI, and WGI** | **LSR Index at the reopening date (recalibrated)** |
| --- | --- | --- | --- | --- | --- | --- | --- | --- |
| **Successful high-income countries** |  |  |  |  |  |  |  |  |
| Australia | 42 | 48.67 | 0.84 | 1.00 | 0.98 | 0.92 | 0.93 | 45.46 |
| Germany | 46 | 43.58 | 0.71 | 1.00 | 0.96 | 0.89 | 0.89 | 38.76 |
| New Zealand | 49 | 70.18 | 0.64 | 0.96 | 0.99 | 1.00 | 0.90 | 63.06 |
| Denmark | 68 | 19.30 | 0.92 | 0.98 | 1.00 | 0.95 | 0.96 | 18.59 |
| Austria | 45 | 40.42 | 0.77 | 0.95 | 0.94 | 0.88 | 0.88 | 35.72 |
| Spain | 73 | 16.00 | 0.45 | 0.91 | 0.92 | 0.64 | 0.73 | 11.69 |
| Italy | 56 | 4.53 | 0.50 | 0.89 | 0.89 | 0.53 | 0.70 | 3.19 |
| Japan | 47 | 74.61 | 0.61 | 0.95 | 0.96 | 0.83 | 0.84 | 62.54 |
| Singapore | 55 | 9.30 | 1.00 | 0.99 | 0.85 | 0.94 | 0.94 | 8.78 |
| *Overall, mean (SD)* | *53.44 (10.74)* | *36.29 (25.69)* | *0.71 (0.18)* | *0.96 (0.04)* | *0.94 (0.05)* | *0.84 (0.16)* | *0.87 (0.09)* | *31.98 (22.64)* |
| **Successful middle/low income countries** |  |  |  |  |  |  |  |  |
| Turkey | 44 | 41.19 | 0.13 | 0.74 | 0.46 | 0.19 | 0.38 | 15.57 |
| Croatia | 49 | 37.53 | 0.22 | 0.80 | 0.77 | 0.52 | 0.58 | 21.64 |
| Mali | 121 | 34.81 | 0.00 | 0.00 | 0.00 | 0.02 | 0.00 | 0.15 |
| Malaysia | 84 | 50.93 | 0.16 | 0.74 | 0.65 | 0.51 | 0.52 | 26.27 |
| Thailand | 86 | 85.86 | 0.11 | 0.66 | 0.51 | 0.29 | 0.39 | 33.59 |
| Vietnam | 22 | 69.23 | 0.03 | 0.52 | 0.47 | 0.24 | 0.31 | 21.71 |
| Hungary | 52 | 11.00 | 0.24 | 0.82 | 0.75 | 0.52 | 0.58 | 6.40 |
| *Overall, mean (SD)* | *65.43 (33.30)* | *47.22 (24.45)* | *0.13 (0.09)* | *0.61 (0.29)* | *0.52 (0.26)* | *0.33 (0.20)* | *0.39 (0.20)* | *17.90 (11.53)* |
|  |  |  |  |  |  |  |  |  |
| ***Median waiting period for High LSR (LSR>20) = 24*** | | | | | | | | |
| ***Median waiting period for Low LSR (LSR≤20) =15*** | | | | | | | | |
|  |  |  |  |  |  |  |  |  |
| **Unsuccessful countries** |  |  |  |  |  |  |  |  |
| Romania | 48 | 13.40 | 0.19 | 0.76 | 0.69 | 0.41 | 0.51 | 6.85 |
| Saudi Arabia | 77 | 21.07 | 0.35 | 0.84 | 0.38 | 0.27 | 0.46 | 9.70 |
| Iran | 29 | 25.08 | 0.07 | 0.72 | 0.44 | 0.00 | 0.31 | 7.73 |
| Pakistan | 18 | -46.09 | 0.01 | 0.26 | 0.02 | 0.01 | 0.08 | -3.46 |
| Colombia | 33 | -52.40 | 0.09 | 0.65 | 0.59 | 0.29 | 0.40 | -21.18 |
| Poland | 20 | -48.14 | 0.23 | 0.87 | 0.82 | 0.59 | 0.63 | -30.16 |
| Ghana | 24 | -73.90 | 0.02 | 0.33 | 0.38 | 0.37 | 0.28 | -20.35 |
| Ukraine | 56 | -26.44 | 0.04 | 0.63 | 0.57 | 0.11 | 0.34 | -9.00 |
| *Overall, mean (SD)* | *38.13 (20.60)* | *-23.43 (38.19)* | *0.12 (0.12)* | *0.63 (0.22)* | *0.49 (0.24)* | *0.26 (0.20)* | *0.38 (0.17)* | *-7.48 (15.20)* |

LSR, Large-scale reopening; HDI, Human Development Index; SPI, Social Progress Index; WGI, World Governance Indicator; SD, standard deviation
